# Supplementary material for: Measurement Report: Effects of anthropogenic emissions and environmental factors on biogenic secondary organic aerosol (BSOA) formation in a coastal city of Southeastern China
Source: Copernicus journal article supplement (doi:10.5194/acp-2022-220), 2022-03-24
Supplement: Supplementary file 1 [file acp-2022-220-supplement.pdf]

1 **Supplementary for “Measurement Report: Effects of**  
2 **anthropogenic emissions and environmental factors on biogenic**  
3 **secondary organic aerosol (BSOA) formation in a coastal city of**  
4 **Southeastern China”**

5

6 Youwei Hong<sup>a,b,c,d</sup>, Xinbei Xu<sup>a,b,c</sup>, Dan Liao<sup>e</sup>, Taotao Liu<sup>a,b,c</sup>, Xiaoting Ji<sup>a,b,c</sup>, Ke Xu<sup>a,b,d</sup>, Chunyang  
7 Liao<sup>f</sup>, Ting Wang<sup>g</sup>, Chunshui Lin<sup>g</sup>, Jinsheng Chen<sup>a,b,c</sup> \*

8

9 <sup>a</sup>Center for Excellence in Regional Atmospheric Environment, Institute of Urban Environment,  
10 Chinese Academy of Sciences, Xiamen, 361021, China

11 <sup>b</sup>Key Lab of Urban Environment and Health, Institute of Urban Environment, Chinese Academy of  
12 Sciences, Xiamen, 361021, China

13 <sup>c</sup>University of Chinese Academy of Sciences, Beijing, 100049, China

14 <sup>d</sup>School of Life Sciences, Hebei University, Baoding, 071000, China

15 <sup>e</sup>College of Environment and Public Health, Xiamen Huaxia University, Xiamen 361024, China

16 <sup>f</sup>State Key Laboratory of Environmental Chemistry and Ecotoxicology, Research Center for Eco-  
17 Environmental Sciences, Chinese Academy of Sciences, Beijing 100085, China

18 <sup>g</sup> Institute of Earth Environment, Chinese Academy of Sciences, Xi'an, 710061, China

19

20 \*Corresponding author E-mail: Jinsheng Chen ([jschen@iue.ac.cn](mailto:jschen@iue.ac.cn)); Youwei Hong  
21 ([ywhong@iue.ac.cn](mailto:ywhong@iue.ac.cn))

22

23

24

25

26

27

28

29

30

### WINTER

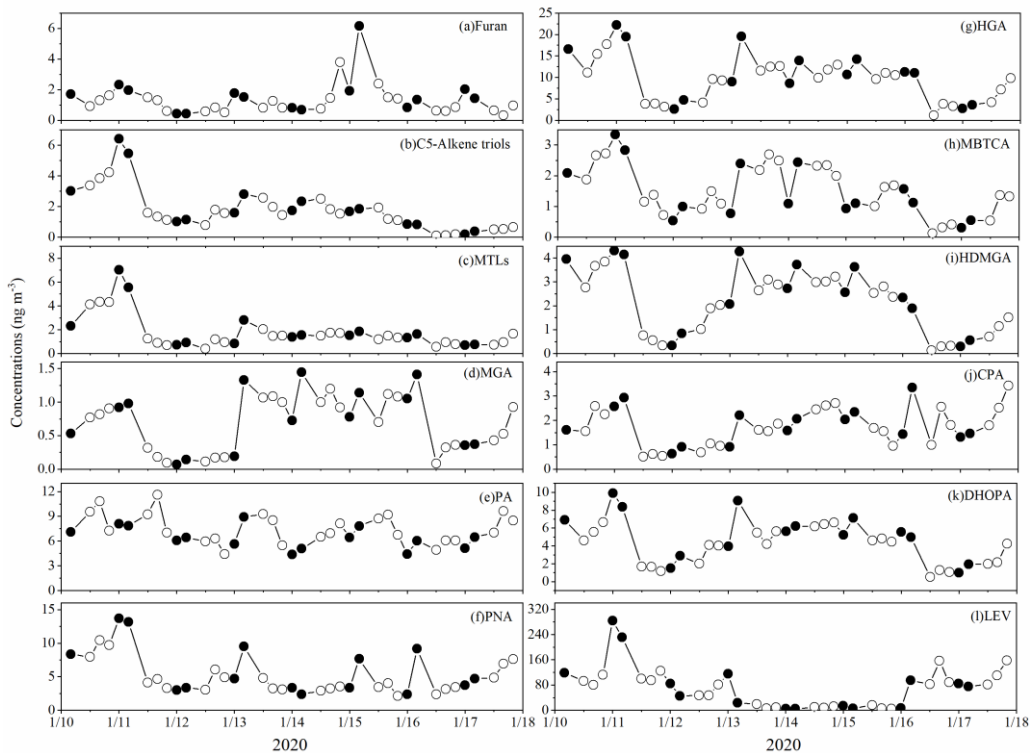

31

### SUMMER

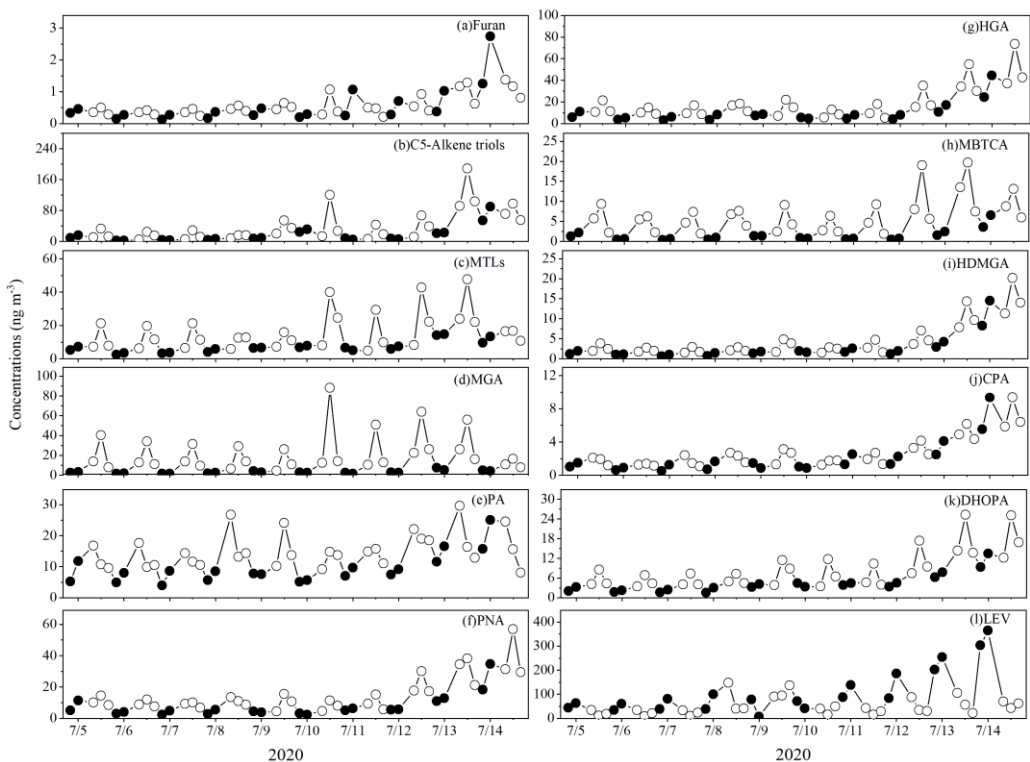

32

33 Fig.S1. Temporal variations of SOA tracers detected in the wintertime and  
 34 summertime PM<sub>2.5</sub> samples in the coastal city of Southeast China

35

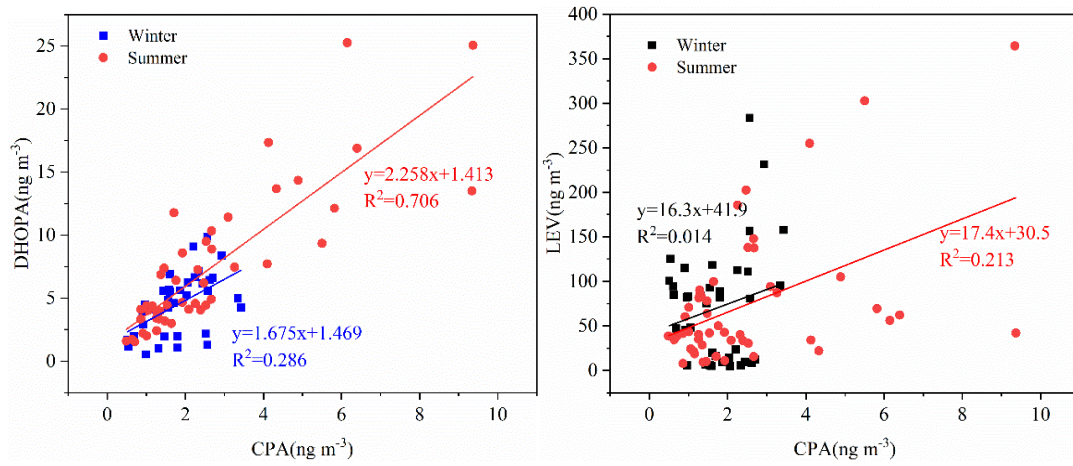

36

37

**Fig.S2 Correlations of CPA, LEV and DHOPA during winter and summertime**

38

39

40

41

42

43

44

45

46

47

48

49

50

51

52

53

54

55
